# Supplementary material for: A modular approach to volatile organic compound samplers for tethered balloon and drone platforms
Source: Copernicus journal article supplement (doi:10.5194/amt-2024-96), 2024-06-28
Supplement: Supplementary file [file amt-2024-96-AC1-supplement.pdf]

Responses to the Reviewers for the Manuscript Submitted to Atmospheric Measurement Techniques entitled “A modular approach to volatile organic compound samplers for tethered balloon and drone platforms” (amt-2024-96)

Note: Reviewer comments are in blue, our responses to the reviewers are in black, and changes to the text are included in red.

Comments to Reviewers:

We would like to thank all reviewers for their time and contributions to improving the manuscript. As requested, major and minor revisions have been made to improve the clarity, introduction, language, analysis, and interpretation. All minor/grammatical revisions were incorporated, and major revisions are discussed in more detail in the comments below.

**Reviewer #1**

In their manuscript "A modular approach to volatile organic compound samplers for tethered balloon and drone platforms" (amt-2024-29), the authors present an instrument for collecting multiple sorbent tube samples that is suitable for balloon- and drone-based platforms. In general, this is a major topic in VOC sampling and the subject of many recent advances. The instrument described here is a nice addition to the suite of custom tools that have been developed throughout the research community. And the reported applications demonstrate the utility of these measurements. To be suitable for publication, this manuscript should more fully examine the existing literature and explore what tools are out there. Many of the goals achieved in this work have been previously demonstrated. The authors are in a bit of a rock and a hard place, because many of the samplers previously demonstrated are not commercially available, so there is value to providing detail and demonstrating their own solution and I think it is still valuable to publish this work. However, with that in mind, I would have liked to see a little bit more of a demonstration of the science that will actually be achieved with this device and/or a demonstration of some of the next-step advances they describe as being possible and would advance the field. Specifically my two major concerns are described here:

(1) There are details missing on the technical aspects of this device. For example: its overall weight and size are only in the abstract, the capacity of the battery is not provided, there is a lack of clarity about the control system (why a computer and a microcontroller?), whether power for the UAV version is being supplied by the UAV itself, how or if it is being integrated into the TBS payload, etc.

**Response:** The authors thank the reviewer for their comment and acknowledge the lack of specific details (e.g., sampler weight and power sources) on the technical aspects of the described TBS sampler. Additional information has been included in the methods section of the manuscript, including material regarding the weight, power sources, sample control (i.e., microcontrollers and computers), integration into the TBS payload, and the flexibility of the design as addressed in the specific comments below.

(2) The introduction overlooks prior work that demonstrated many of the achievements shown here, primarily multiple samples collected from a single airborne package. The authors elude to

many promising features of their work, including communication with the ground, potential to integrate signals from other instruments, and complex sampling strategies. These advances would truly be novel and show the field what can be done, but are not really demonstrated here (and their theoretical possibility was mentioned in some of the previous literature). The authors should look a little more deeply into the literature (a few citations are provided, but I think there are others) and more thoroughly identify the gaps and how their work fits into that context.

**Response:** The authors greatly appreciate this comment and took advantage of it to restructure the manuscript introduction, thereby providing more clarity of the previous literature. Specifically breaking down key advancements in UAV platforms and the corresponding gaps in TBS literature/approaches. This resulted in a more streamlined introduction and a more specific problem statement focusing on the TBS system.

### **Specific comments:**

**Comment #1:** Line 68-70. There have been at least some efforts (including work published in this journal) on independent, drone-compatible VOC samplers, both for collection of multiple coordinated samples across multiple platforms (DOI: 10.5194/amt-16-4681-2023), and for sequential samples within the same platform (DOIs: 10.5194/amt-12-3123-2019; 10.1016/j.jes.2024.04.016) as is being reported here. So this statement is not really true and highlights some need for a bit more literature review to place this work in the context of prior work.

**Response #1:** The authors thank the reviewer for their comment. This reviewer highlights the advancements of UAV-based VOCs samplers. We have corrected the text to highlight the lack of similar advancements for TBS-based VOCs samplers, which is the main focus of this manuscript.

Lines 78 – 83, “Recent advancements in sorbent tube VOCs samplers have focused on providing low cost, portable samplers (Hurley et al., 2023) and UAV-based VOC samplers with multiple tube sampling capabilities (Chen et al., 2018; Batista et al., 2019; Mckinney et al., 2019; Asher et al., 2021; Li et al., 2021; Leitner et al., 2023; Yang et al., 2023; Zhai et al., 2025). Many of these advancements have been made possible through miniaturization (e.g., size and power requirements) of key components such as computers, pumps, valves, and relays. However, a modular sampling system capable of functioning independently to collect multiple VOC samples per flight on a TBS has not been designed and deployed.”

**Comment #2:** Line 86-87. It's not clear what the author's mean by this statement. For example, commercially available options can monitor trace gas levels and use them as triggers for sorbent tube collection (see for example the SENSIT SPOD), and canisters have regularly been collected alongside comprehensive instrument payloads, including with an arbitrary trigger for collection (DOI: 10.5194/amt-10-291-2017). What do the author's mean by "integrated" in this context?

**Response #2:** The authors thank the reviewer for their comment. The phrase integrated describes the need for VOC sampling systems to be able to work with the power and weight limits of the sampling platform itself (UAV or TBS). Additional text has been added to clarify this point.

Lines 75 – 76, “These systems were not designed for flight-based measurements or to be integrated into flight platforms with additional sensors by meeting the weight, size, and power limits.”

**Comment #3:** Line 91: By "integration" in the ARM TBS payload, do author's mean they use the meteorological, aerosol, and ozone data to inform timing of sample collection, or just that they share a data acquisition system? The latter does not seem like a scientific advance, but rather solving a specific technical issue relevant just to the TBS system. Throughout the work, it looks like this sampler only uses preset timing to determine sample intervals, so it's not clear to me that it is really "integrated" in any meaningful way.

**Response #3:** This comment was addressed in Response #2 (see above)

**Comment #4:** Line 103-104. "uses lighter-than-air principles to obtain its initial lift" seems overly jargony/complex. I would say that the fact that helium-filled balloons rise can be considered common knowledge and does not need to be explained

**Response #4:** The authors agree with the reviewer and their comment was incorporated. Note: The phrase "uses lighter-than-air principles to obtain its initial lift" was removed from the manuscript. The text now reads

Lines 99 – 100, “In brief, TBS flights can reach a maximum altitude of 1.5 km AGL when the weather permits and carry a maximum payload of 33 kg via a tether controlled by a winch system.”

**Comment #5:** Line 111. Authors should note the size range of particles measured by POPS, since later concentrations are provided just as total numbers

**Response #5:** The authors appreciated the reviewer’s comment and have incorporated it into the manuscript. The size range of particles measured by the POPs has been added to the text, as referenced in (Creamean et al., 2021), which now reads

Lines 106 – 108, “In addition, particle size distributions were measured using a Portable Optical Particle Spectrometer (POPS, Handix Scientific LLC, CO, USA; 135 nm – 3615 nm), and ozone concentrations were provided via an electrochemical concentration cell (ECC) ozonesonde (Model 2Z, En-Sci, CO, USA).”

**Comment #6:** Line 131. The authors should clarify what they mean by modular. Which components can be separated and recombined in different ways?

**Response #6:** A key goal of the manuscript was to develop a sampler design that incorporates scalable components and flexible construction, allowing it to be adapted for the different mass and power requirements of TBS, UAV, or other platforms. This modular approach provides a robust lower cost design (e.g., reduced maintenance and down time, access to interchangeable parts, and redundancy between the designs) that enables future users to customize the sampler to suit their specific applications. For example, the internal components described can be scaled up or down for the user's needs to optimize features such as weight, VOC collection capacity, and sampling control. For example, in this study, the modular design facilitated the adaptation of the sampler from the original TBS configuration down to a UAV platform, specifically by removing the computer and utilizing only the microcontroller to control VOC collection. Additional uses of this sampler have reintroduced the computer and used its remote access capabilities to control VOC collection during a long-term, ground-based deployment. The other internal components, including the valves, pump, and voltage regulators, can also be recombined or expanded in different configurations to adapt to the user's needs and complete various sampling designs, as described in the conclusions.

**Comment #7:** Line 140. It's not really clear to me why there needs to be a computer on board. Why not just provide firmware to the Arduino and re-program it on the ground if necessary? Including the computer seems like extra weight and power. Or conversely, it looks like the UDOO Bolt has analog and digital I/O, so why include the microcontroller at all?

**Response #7:** The authors thank the reviewer for their thoughtful comment. We recognize that individually the microcontroller and computer each offer distinct advantages. However, in this study, the UAV sampler utilized the onboard computer to communicate with the microcontroller, whereas the TBS sampler incorporated a computer to provide greater flexibility and opportunities than a microcontroller alone, which highlights the modular design of our approach.

In future studies, for example, users may leverage metadata to direct sampling, which would require a sampler capable of capturing data, running diagnostics, and adjusting the sampling strategy in response to changing conditions. These capabilities necessitate a computer rather than a microcontroller. In addition, while the computer includes digital I/O pins, integrating a microcontroller expands the capacity to communicate with multiple valves and a pump, enabling more complex sampling configurations. Moreover, the UDOO computer is lightweight (< 250 grams) and is relatively low cost (~\$400 USD), making its inclusion in the sampler practical and feasible.

**Comment #8:** Line 147. How was flow controlled? Is flow checked on each tube, since their resistances could be different, or is it measured in real time? Also, no information about the pump is provided - what pump is being used?

**Response #8:** This is a great comment, and more details on the sampling flow control and pumps was added. The reviewer's comment was incorporated and information about the flow calibration and the pump used were included in the text.

Lines 147 – 148, “Before each sampling day, a flow calibration was conducted on each sorbent tube to account for potential variability among the tubes and to ensure the flow remained at  $0.1 \pm 0.002$  lpm, as measured using a flowmeter (Model 5200, TSI Inc, MN, USA). When adjustments to the sample flow rate were necessary, users modified the pump voltage (Model E242-12, Parker, OH, USA) using the digital voltage regulator.”

Note: The error associated with the flow meter was addressed in a response back to Reviewer 2 (i.e., 2%).

**Comment #9:** Line 204. What do the author's mean the code initiation was synced? That the start time was synced with the start time of the flight?

**Response #9:** Yes, the start time was synced. The text has been updated to improve the clarity of the line.

Lines 210 – 211, “The code initiation was synchronized to match the sampling strategies of the VOC sorbent tube collection with the TBS platform's flight plan.”

**Comment #10:** Line 236. More information about this pairing would be helpful. Is the power for the UAV being directly used to power this device? And what communication features are being used. In general, more description of the "modularity" of this device would improve understanding of its uniqueness and value. This is later described in more detail in lines 254-256 and I agree ground-based communication with the device is a big step forward that I'm not sure has been previously demonstrated; this should be described earlier and/or in the methods.

**Response #10:** The authors thank the reviewer for their comment and agree the details about the communication between the UAV and the sampler were separated. The texts from lines 254 – 256 were moved up to be with the initial description in line 236. The text now reads

Lines 242 – 247, “At the San Jacinto Battleground State Historic Site, meteorological parameters, ozone, and four VOC samples were collected across two UAV flights on September 13<sup>th</sup>, 2022 (Fig. 3). The UAV sampler design demonstrates the scalability of the modular VOC sampler, and the flights showcase the utility of pairing the internal power and communication features of the UAV with the lightweight, robust components of the sampler to successfully collect VOCs. In this setup, the UAV control software initiated VOC collection by activating relays within the UAV system. These relays supply power from the UAV batteries to the sampling pump and the valves to control sampling timing and selecting which sorbent tube to sample.”

In addition, more text about the modularity of the system has been added and described further in the authors response to comment #6.

**Comment #11:** Line 250. Was the use of metadata used here or demonstrated? Complex sampling strategies have been previously shown to be possible on the other samplers mentioned above, but the inclusion of other sensors, though likely possible in the other systems, would to my knowledge be a new advance worth demonstrating explicitly.

**Response #11:** No, metadata was not used to direct sampling in this study. Instead, data from additional instruments on the TBS and UAV packages (e.g., meteorological, aerosol, and ozone) were utilized to provide context for interpreting VOC data. The authors agree that using metadata to influence and modify sampling would be a valuable consideration for future users. To support such advanced applications, the sampler design includes both a computer and microcontroller, providing the flexibility needed to implement complex sampling designs in the future. This direction is mentioned in the conclusions where a bulleted list of potential future operations is provided (see bullet point #3 below).

- Additional sensors or monitors (e.g., ozone, pressure, GPS, etc) could be added to the system and provide real-time measurements to the computer via Bluetooth communication. These sensors could be integrated into a data-driven sampling strategy that allows for a more targeted VOC analysis in response to in-situ conditions.

**Comment #12:** Line 266. "1 A" is not a unit of power, do the authors mean 1 Ah? What is the size of the battery?

**Response #12:** The reviewer's comment was incorporated and the correct unit of measure (e.g., 1 Ah) was included in the text. The UAV battery information was also included in the text. The text now reads

Lines 277 – 279, “When onboard the UAV, the sampling system utilized the internal batteries and consumed 1 Ah of power during VOC collection, representing 4% of the capacity (two 21,000 mAh, 22.2 VDC batteries).”

**Comment #13:** Line 343. Could the authors estimate increase in mass due to each additional tube? This would involve the tube, valve, and lines, are there other components that would also need to be scaled?

**Response #13:** The reviewer's comment was incorporated and the mass for a sorbent tube, a valve, the necessary tubing, and a compression fitting were estimated to be 75 g per additional resin tube. The text was updated to include this estimate and now reads

Lines 357 – 360, “For example, the sorbent tube quantity could be scaled up to increase the number of samples per flight, with minimal increases to the power draw and sampler

mass. A sorbent tube, valve, tubing, and a Teflon compression fitting have a mass of approximately 75 g, representing 3% and 9% of the TBS and UAV sampler mass, respectively. “

## References

- Asher, E., Hills, A. J., Hornbrook, R. S., Shertz, S., Gabbard, S., Stephens, B. B., Helmig, D., and Apel, E. C.: Unpiloted Aircraft System Instrument for the Rapid Collection of Whole Air Samples and Measurements for Environmental Monitoring and Air Quality Studies, *Environmental Science & Technology*, 55, 5657-5667, 10.1021/acs.est.0c07213, 2021.
- Batista, C. E., Ye, J., Ribeiro, I. O., Guimarães, P. C., Medeiros, A. S. S., Barbosa, R. G., Oliveira, R. L., Duvoisin, S., Jardine, K. J., Gu, D., Guenther, A. B., Mckinney, K. A., Martins, L. D., Souza, R. A. F., and Martin, S. T.: Intermediate-scale horizontal isoprene concentrations in the near-canopy forest atmosphere and implications for emission heterogeneity, *Proceedings of the National Academy of Sciences*, 116, 19318-19323, 10.1073/pnas.1904154116, 2019.
- Chen, J., Scircle, A., Black, O., Cizdziel, J. V., Watson, N., Wevill, D., and Zhou, Y.: On the use of multicopters for sampling and analysis of volatile organic compounds in the air by adsorption/thermal desorption GC-MS, *Air Quality, Atmosphere & Health*, 11, 835-842, 10.1007/s11869-018-0588-y, 2018.
- Creamean, J. M., De Boer, G., Telg, H., Mei, F., Dexheimer, D., Shupe, M. D., Solomon, A., and McComiskey, A.: Assessing the vertical structure of Arctic aerosols using balloon-borne measurements, *Atmos Chem Phys*, 21, 1737-1757, 10.5194/acp-21-1737-2021, 2021.
- Hurley, J. F., Caceres, A., McGlynn, D. F., Tovillo, M., Pinar, S., Schürch, R., Onufrieva, K., and Isaacman-Vanwertz, G.: Portable, low-cost samplers for distributed sampling of atmospheric gases, 10.5194/egusphere-2023-825, 2023.
- Leitner, S., Feichtinger, W., Mayer, S., Mayer, F., Krompetz, D., Hood-Nowotny, R., and Watzinger, A.: UAV-based sampling systems to analyse greenhouse gases and volatile organic compounds encompassing compound-specific stable isotope analysis, *Atmos Meas Tech*, 16, 513-527, 10.5194/amt-16-513-2023, 2023.
- Li, Y., Liu, B., Ye, J., Jia, T., Khuzestani, R. B., Sun, J. Y., Cheng, X., Zheng, Y., Li, X., Wu, C., Xin, J., Wu, Z., Tomoto, M. A., Mckinney, K. A., Martin, S. T., Li, Y. J., and Chen, Q.: Unmanned Aerial Vehicle Measurements of Volatile Organic Compounds over a Subtropical Forest in China and Implications for Emission Heterogeneity, *Acs Earth Space Chem*, 5, 247-256, 10.1021/acsearthspacechem.0c00271, 2021.
- McKinney, K. A., Wang, D., Ye, J., de Fouchier, J. B., Guimarães, P. C., Batista, C. E., Souza, R. A. F., Alves, E. G., Gu, D., Guenther, A. B., and Martin, S. T.: A sampler for atmospheric volatile organic compounds by copter unmanned aerial vehicles, *Atmos. Meas. Tech.*, 12, 3123-3135, 10.5194/amt-12-3123-2019, 2019.

Yang, S., Li, X., Zeng, L., Yu, X., Liu, Y., Lu, S., Huang, X., Zhang, D., Xu, H., Lin, S., Liu, H., Feng, M., Song, D., Tan, Q., Cui, J., Wang, L., Chen, Y., Wang, W., Sun, H., Song, M., Kong, L., Liu, Y., Wei, L., Zhu, X., and Zhang, Y.: Development of multi-channel whole-air sampling equipment onboard an unmanned aerial vehicle for investigating volatile organic compounds' vertical distribution in the planetary boundary layer, *Atmos Meas Tech*, 16, 501-512, 10.5194/amt-16-501-2023, 2023.

Zhai, H., Zhou, J., Zhao, W., Du, W., Wei, N., Liu, Q., Wang, S., Zhang, J., Cui, W., Zhang, W., Lu, Y., Zhu, Z., and Liu, Y.: Development of a UAV-borne sorbent tube sampler and its application on the vertical profile measurement of volatile organic compounds, *Journal of Environmental Sciences*, 152, 276-286, <https://doi.org/10.1016/j.jes.2024.04.016>, 2025.
